# Supplementary material for: Maximizing the impact of limited vaccine supply under different early epidemic conditions: a 2-city modelling analysis of monkeypox virus transmission among men who have sex with men
Source: PubMed Central journal article supplement — CMAJ. 2022 Nov 28;194(46):E1560–7. doi: 10.1503/cmaj.221232 (PMC9828961; doi:10.1503/cmaj.221232), 2022-11-28
Supplement: 221232-res-1-at.pdf [file 221232-res-1-at.pdf]

## Appendix 1

**Title:** Maximizing the impact of limited vaccine supply under different early epidemic conditions: a two-city modelling analysis of monkeypox transmission among men who have sex with men

**Authors:** Jesse Knight, BEng MASc<sup>1,2,\*</sup>, Darrell H.S. Tan, MD PhD<sup>1,2,3,4</sup>, and Sharmistha Mishra, MD PhD<sup>1,2,3,4</sup>

<sup>1</sup> MAP Centre for Urban Health Solutions, Unity Health Toronto

<sup>2</sup> Institute of Medical Science, University of Toronto

<sup>3</sup> Institute of Health Policy, Management, and Evaluation, University of Toronto

<sup>4</sup> Division of Infectious Diseases, Department of Medicine, University of Toronto

\* Corresponding author: jesse.knight@mail.utoronto.ca

**Date:** 2022 November

**Contributions:** JK and SM conceptualized and designed the study, and drafted the manuscript. JK developed the model, conducted the analyses, and generated the results. SM and DT provided key interpretation of the results. DT contributed critical review of the manuscript. All authors contributed to addressing revisions, gave final approval of the version to be published, and agreed to act as guarantors of the work.

**Funding:** The study was supported by: the Natural Sciences and Engineering Research Council of Canada (NSERC CGS-D); and the University of Toronto Emerging and Pandemic Infections Consortium (EPIC) MPXV Collaborative Rapid Research Response. No funder had any direct role in the research.

**Competing Interests:** None declared.

**Acknowledgements:** We thank: Kristy Yiu (Unity Health Toronto) for research coordination support; Huiting Ma, Linwei Wang, Oliver Gatalo, and Ekta Mishra (Unity Health Toronto) for support conceptualizing and parameterizing the model; and Mackenzie Hamilton (Unity Health Toronto) for her feedback on the manuscript. We also thank Toronto Public Health and members of the MPox Community Mobilization Group for their insights, ongoing engagement, and feedback on preliminary results. SM acknowledges support from a Tier 2 Canada Research Chair in Mathematical Modeling. DHST acknowledges support from a Tier 2 Canada Research Chair in HIV Prevention and STI Research.

**Data Availability:** All analysis code is available at:

[github.com/mishra-lab/mpox-model-compartmental](https://github.com/mishra-lab/mpox-model-compartmental)

Figures and numeric results can be obtained directly from this code using R.

## A: Model Details

Table A.1 summarizes the notation used, and Figure A.1 illustrates the model structure, repeated (verbatim) from Figure 1 for easier reference.

**Table A1.** Notation

| Symbol        | Definition <sup>a</sup>                                                  |
|---------------|--------------------------------------------------------------------------|
| $c$           | city index $\in \{A, B\}$                                                |
| $r$           | risk group index $\in \{\text{higher, lower}\}$                          |
| $y$           | type of contact index $\in \{\text{sexual, close non-sexual}\}$          |
| $x'$          | index “x” for a contact, versus self                                     |
| $N$           | population size                                                          |
| $C$           | contact rate                                                             |
| $Q$           | total contacts offered: $NC$                                             |
| $\epsilon$    | assortativity parameter $\in [1: \text{assortative, } 0: \text{random}]$ |
| $\lambda$     | incidence rate (force of infection)                                      |
| $\beta$       | secondary attack rate <sup>b</sup>                                       |
| $\sigma^{-1}$ | duration of latent/incubation period                                     |
| $\gamma^{-1}$ | duration of infectious/symptom period                                    |
| $\Phi$        | probability of contact formation                                         |
| $\rho$        | proportion isolating among infectious                                    |
| $v$           | vaccination rate                                                         |
| $f$           | vaccine effectiveness (leaky-type)                                       |

<sup>a</sup> all durations in days; all rates in per-day. <sup>b</sup> per-partnership transmission probability

### A.1 Differential Equations

Equation (A.1) summarizes the system of differential equations for the health states; each equation is repeated for each combination of city  $c$  (A, B) and risk group  $r$  (higher, lower) (4 total), but we omit the  $cr$  index notation for clarity.

$$\begin{aligned}\frac{d}{dt}S &= -vS - \lambda S \\ \frac{d}{dt}S &= +vS - (1-f)\lambda V \\ \frac{d}{dt}E &= +\lambda S + (1-f)\lambda V - \sigma E \\ \frac{d}{dt}I &= +\sigma E - \frac{\gamma}{1-\rho}I \\ \frac{d}{dt}H &= +\frac{\gamma}{1-\rho}I - \frac{\gamma}{\rho}H \\ \frac{d}{dt}R &= +\frac{\gamma}{\rho}H\end{aligned}$$

### A.2 Incidence Rate

The incidence rate (force of infection) for non-vaccinated susceptible individuals in city  $c$  and risk group  $r$  (“group  $cr$ ”) is defined as:

Appendix 1, as supplied by the authors. Appendix to: Knight J, Tan DHS, Mishra S. Maximizing the impact of limited vaccine supply under different early epidemic conditions: a 2-city modelling analysis of monkeypox virus transmission among men who have sex with men. *CMAJ* 2022. doi: 10.1503/cmaj.221232. Copyright © 2022 The Author(s) or their employer(s). To receive this resource in an accessible format, please contact us at [cmajgroup@cmaj.ca](mailto:cmajgroup@cmaj.ca).

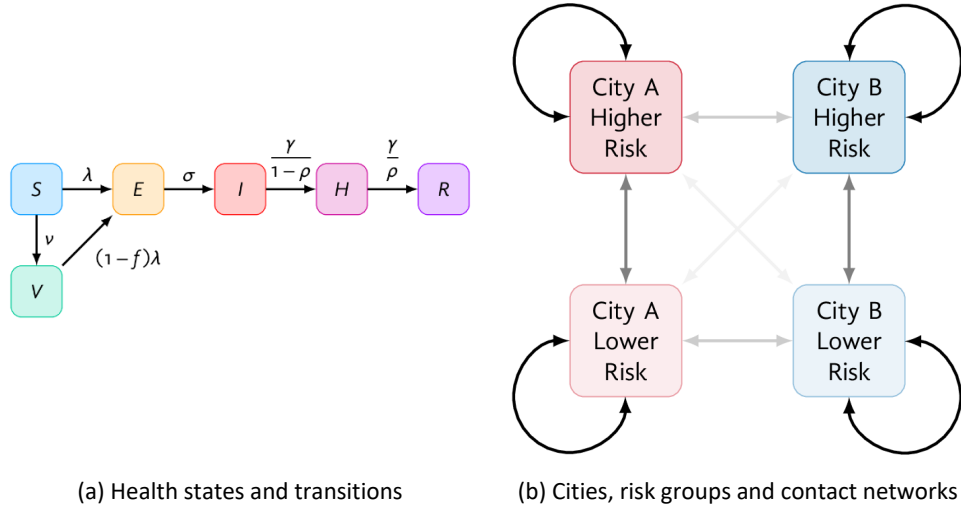

**Figure A.1.** Model structure

(a) S: susceptible; V: vaccinated; E: exposed; I: infectious; H: isolating; R: recovered. (b) Risk: of MPXV infection/transmission, defined by numbers of sexual partners. Arrow opacity is qualitatively related to the chance of sexual contact formation from any group to another (higher opacity reflects greater chance of contact). See Appendix 1 Section A (model details) for rate definitions.

$$\lambda_{cr} = \sum_{y c' r'} (1 - \rho) \beta_y C_{y cr} \Phi_{y cr c' r'} \frac{I_{c' r'}}{N_{c' r'}}$$

where:  $\rho$  is the proportion isolating among infectious;  $\beta_y$  is the transmission probability per type- $y$  contact;  $C_{y cr}$  is the type- $y$  contact rate among group  $cr$ ;  $\Phi_{y cr c' r'}$  is the probability of forming a type- $y$  contact with group  $c' r'$  (contacts) among group  $cr$  (self); and  $N_{c' r'}$  is the size of group  $c' r'$ .

Among vaccinated, the incidence rate is simply reduced by a factor  $(1 - f)$ , where  $f$  is the vaccine effectiveness (leaky-type).

### A.3 Mixing

Mixing between risk groups and cities was implemented using an adaptation of a common approach [1, 2]. We denote the total contacts “offered” by group  $cr$  as:  $Q_{cr} = N_{cr} C_{cr}$ ; and denote the margins (sums)  $Q_c = \sum_r Q_{cr}$ ;  $Q_r = \sum_c Q_{cr}$ ; and  $Q = \sum_{cr} Q_{cr}$ . The probability of contact formation with group  $c' r'$  among group  $cr$  is defined as:

$$\Phi_{cr c' r'} = \epsilon_c \delta_{cc'} \left( \epsilon_r \delta_{rr'} + (1 - \epsilon_r) \frac{Q_{c' r'}}{Q_{c'}} \right) + (1 - \epsilon_c) \frac{Q_{c'}}{Q} \left( \epsilon_r \delta_{rr'} + (1 - \epsilon_r) \frac{Q_{r'}}{Q} \right)$$

where:  $\delta_{ii'} = \{1 \text{ if } i = i'; 0 \text{ if } i \neq i'\}$  is an identity matrix; and  $\epsilon_c, \epsilon_r \in [0, 1]$  are assortativity parameters for mixing among cities and risk groups, respectively, such that  $\epsilon = 1$  yields complete group separation and  $\epsilon = 0$  yields completely random (proportionate) mixing.

For clarity, we omit the index of contact type  $y$ , although  $\epsilon_r, C_{cr}$  and thus  $\Phi_{cr c' r'}$  are all further stratified by  $y$ .

Appendix 1, as supplied by the authors. Appendix to: Knight J, Tan DHS, Mishra S. Maximizing the impact of limited vaccine supply under different early epidemic conditions: a 2-city modelling analysis of monkeypox virus transmission among men who have sex with men. *CMAJ* 2022. doi: 10.1503/cmaj.221232. Copyright © 2022 The Author(s) or their employer(s). To receive this resource in an accessible format, please contact us at [cmajgroup@cmaj.ca](mailto:cmajgroup@cmaj.ca).

## A.4 City $R_0$

The basic reproduction number  $R_0$  for each city was defined in the absence of vaccination and ignoring between-city mixing — i.e. with  $\epsilon_c = 1$ . Following [3], we define  $R_0$  as the dominant eigenvalue of the city-specific next generation matrix  $K$ ; matrix elements  $K_{rr'}$  are defined as:

$$K_{rr'} = (1 - \rho) \sum_y \beta_y C_{yr} \Phi_{yrr'} \frac{N_r}{N_{r'}} \gamma^{-1}$$

where:  $\rho$  is the proportion isolating among infectious;  $\beta_y$  is the transmission probability per type- $y$  contact;  $C_{yr}$  is the type- $y$  contact rate among group  $r$ ;  $\Phi_{yrr'}$  is the probability of type- $y$  contact formation with group  $r'$  among group  $r$ ;  $N_r$  is the size of group  $r$ ; and  $\gamma^{-1}$  is the duration of infectiousness.

## A.5 Vaccine Allocation

Vaccination is modelled as distribution of 5000 doses over 30 days from day 45 (167 doses per day). Vaccines are prioritized to the high risk group with 90% sensitivity, such that 4500 doses actually reach the high risk group, and 500 doses are given to the lower risk group. Figure A.2 illustrates vaccination coverage/counts by city/risk group for an example allocation of 80% to city A and 20% to city B.

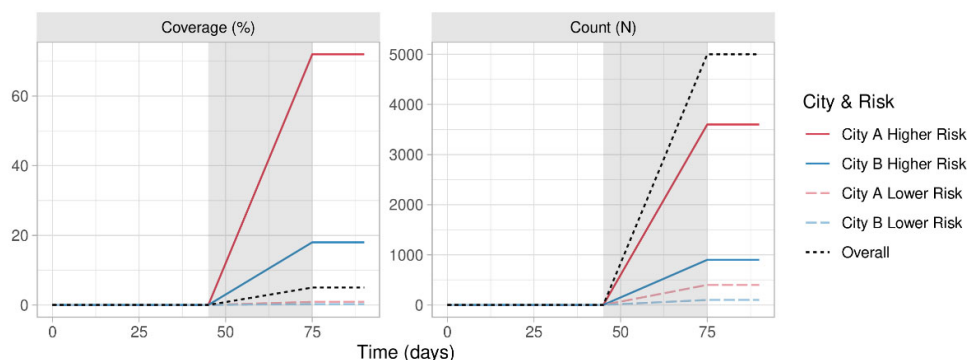

**Figure A.2.** Example vaccine allocation: 80% to city A, and 90% to high risk group

Gray bar indicates period of vaccine roll-out (days 45–75).

## A.6 Parameterization

Model parameter values and stratifications are summarized in Table 1, repeated (verbatim) in Table A.2 for easier reference.

**Risk Groups and Sexual Contacts:** Parameterization of risk groups and contacts was primarily informed by existing analyses conducted to support mathematical modelling of HIV-transmission among GBMSM in Canada [4, p. Appendix 3.2], since sexual history data among GBMSM diagnosed with MPXV in Canada are not yet available. These analyses stratified GBMSM into 88–94% lower risk, with on average 4 sexual partners per-year ( $\approx .01$  per day), and 6–12% higher risk, with approximately 6-times as many partners ( $\approx .07$  per day), reflecting common stratification corresponding to rates of bacterial STI and partner number distributions [21, 22]. Appendix 1, as supplied by the authors. Appendix to: Knight J, Tan DHS, Mishra S. Maximizing the impact of limited vaccine supply under different early epidemic conditions: a 2-city modelling analysis of monkeypox virus transmission among men who have sex with men. *CMAJ* 2022. doi: 10.1503/cmaj.221232. Copyright © 2022 The Author(s) or their employer(s). To receive this resource in an accessible format, please contact us at [cmajgroup@cmaj.ca](mailto:cmajgroup@cmaj.ca).

**Table 1.** Model parameters, including default values and ranges explored via grid sweep

| Parameter <sup>a</sup>                 | Stratum                     | Value             | Range                   | Ref                   |
|----------------------------------------|-----------------------------|-------------------|-------------------------|-----------------------|
| Population size                        | overall                     | 100,000           |                         | [18] <sup>b</sup>     |
|                                        | fraction in city A          | .50               | [.20, .80]              | <sup>b</sup>          |
| Fraction higher risk                   | city A                      | .10               | [.01, .50] <sup>c</sup> | [18] <sup>b</sup>     |
|                                        | city B                      | .10               |                         | [18] <sup>b</sup>     |
| Contact rate                           | close non-sexual, all       | 1                 |                         | [27] <sup>b</sup>     |
|                                        | sexual, lower risk          | .01               |                         | [18] <sup>b</sup>     |
|                                        | sexual, higher risk, city A | .189 <sup>d</sup> | [.10, .25] <sup>c</sup> | [18, 28] <sup>b</sup> |
|                                        | sexual, higher risk, city B | .189 <sup>d</sup> |                         | [18, 28] <sup>b</sup> |
| Assortativity <sup>e</sup>             | cities, all contacts        | .90               | [.70, 1.0]              | [19] <sup>b</sup>     |
|                                        | risk, close non-sexual      | 0                 |                         | <sup>b</sup>          |
|                                        | risk, sexual                | .50               |                         | <sup>b</sup>          |
| Per-contact SAR                        | close non-sexual            | .01 <sup>f</sup>  |                         | [29, 22]              |
|                                        | sexual                      | .90 <sup>d</sup>  |                         | [28] <sup>b</sup>     |
| Initial infections                     | overall                     | 10                |                         | <sup>b</sup>          |
|                                        | fraction in city A          | .50               | [0.0, 1.0]              | <sup>b</sup>          |
| Duration of period                     | latent/incubation           | 8                 |                         | [22, 24, 23, 30]      |
|                                        | infectious/symptoms         | 21                |                         | [21, 22]              |
| Fraction of infectious period isolated | all                         | .50               |                         | [22, 31] <sup>b</sup> |
| Vaccines available                     | all                         | 5000              |                         | <sup>b</sup>          |
| Vaccine effectiveness <sup>g</sup>     | all                         | .85               |                         | [21, 22, 23]          |
| Vaccine prioritization sensitivity     | higher risk                 | .90               |                         | [3] <sup>b</sup>      |
| Vaccine allocation                     | city A                      | .50               | [0.0, 1.0] <sup>h</sup> | –                     |

Note: <sup>a</sup> All durations in days; all rates in per-day. SAR: secondary attack rate. <sup>b</sup> Assumed or representative. <sup>c</sup> Calculated to fit  $R_0 \in [1, 2]$ . <sup>d</sup> Calculated to fit  $R_0 = 1.5$ , reflecting pre-vaccination estimate of MPXV  $R_0$  in Ontario [14] via [10]. <sup>e</sup> Fraction of contacts formed exclusively within-group [34]; 0 implies random mixing between groups and 1 implies no mixing. <sup>f</sup> Calibrated to fit approximately 95% incidence via sexual vs close, non-sexual contacts. <sup>g</sup> Leaky-type: partial protection among all vaccinated, not full protection among a fraction vaccinated. <sup>h</sup> Optimized parameter.

Our present model includes even greater partner numbers among the higher risk group (.10–.25 per day), partly to fit MPXV  $R_0 \in [1, 2]$ , and because the 6-fold value in [4] was mainly applied as a generalized proxy for 6-times higher HIV incidence. Weighted pooling of data from three studies [23, 24, 25] suggested that approximately 12% of respondents reported 20+ sexual partners in the past 6 months ( $\approx .11$  + per day). Our MPXV model also models transmission risk per-partnership, versus per-contact (sex act) as in [4]; with high SAR, MPXV transmission risk would be expected to be driven more by numbers of partners than by total contacts (sex acts).

A retrospective and rapid sexual history survey of 45 individuals diagnosed with MPXV identified that 60% (27 of 45) were diagnosed with an STI in the previous year, 44% (20 of 45) reported more than 10 sexual partners in the previous 3 months, and 44% (20 of 45) reported group sex during the incubation period [26].

**Close, Non-Sexual Contacts:** We defined close, non-sexual contacts as direct exposure of broken skin or mucous membranes, or to bodily fluids or potentially infectious material (including clothing or bedding) without appropriate personal protective equipment, such as sleeping in the same bed. Based on available data on types of partnerships, 30–60% of GBMSM in Canada report

Appendix 1, as supplied by the authors. Appendix to: Knight J, Tan DHS, Mishra S. Maximizing the impact of limited vaccine supply under different early epidemic conditions: a 2-city modelling analysis of monkeypox virus transmission among men who have sex with men. *CMAJ* 2022. doi: 10.1503/cmaj.221232. Copyright © 2022 The Author(s) or their employer(s). To receive this resource in an accessible format, please contact us at [cmajgroup@cmaj.ca](mailto:cmajgroup@cmaj.ca).

a regular sex partner [5], and data on additional living conditions (such as cohabitating with non-sexual partners) was not available.

**Network Connectivity:** There is limited data on proportion of contacts (sexual and close non-sexual) formed between different regional GBMSM networks. Such proportions will also depend on the geographic scale of the networks considered, while our study aimed to be generalizable across scales. In [7] 37.5% of 269 respondents from Waterloo, Ontario had travelled outside the region for sex; however, this does not necessarily reflect the proportion of all sex outside the region. From limited case-series data, evidence suggests that a smaller fraction have likely acquired MPXV infection via sex in other cities: among cases among Toronto residents seen at Unity Health Toronto between 2022 May 20 and July 15: 2/27 were identified as infection from sexual exposures outside Toronto [27].

**Monkeypox Virus (MPXV) & Reproduction Number:** Updated epidemiological data on MPXV infection and transmission in the context of the present epidemic are rapidly emerging [9, 28]. In the absence of high-quality evidence on the secondary attack rate (SAR) of sexual transmission, we assumed a relatively high SAR of 0.9 (per-partnership), drawing on local patient histories, and in order to reproduce  $R_0 \in [1, 2]$ . We estimated  $R_0 \in [1, 2]$  using MPXV case data from Ontario [19] before widespread vaccine roll-out (2022 May 13 – July 4) using the *EpiNow2* R package [20]. We further calibrated the SAR for close, non-sexual to reproduce approximately 95% incidence via sexual vs close, non-sexual contacts [29].

In another model [6], the modelled  $R_0$  for a GBMSM sexual network was greater, even for smaller SAR. Two main factors may explain this discrepancy in modelled  $R_0$  vs SAR in [6] vs our model. First, isolation was not explicitly modelled in [6]; thus the reported SAR in [6] can be considered as after considering isolation, i.e., reduced. Second, the branching process model in [6] captured greater risk heterogeneity than our model, and focused especially on capturing the highest levels of risk (“heavy tail”). Such heterogeneity is directly related to  $R_0$  through the coefficient of variation in contact rates [30]. Thus, this difference in model structure could further explain why modelled  $R_0$  would be greater in [6], for even similar SAR. Finally, our aim was to obtain generalizable insights about network-level vaccine prioritization, rather than to model specific contexts within Ontario; as such, we do not expect our main findings to change with moderate changes to the model simplifications regarding transmission.

## B: Supplemental Results

Figure B.1 illustrates incidence rate and cumulative infections (similar results to Figure 2), for 2 cities identical in: size,  $R_0$ , and imported/seed cases, under three vaccination scenarios: no vaccination, 100% allocation to city A, and equal allocation between cities. Equal allocation minimizes cumulative infections.

Figures B.2–B.5 illustrate cumulative infections averted by day 90 under “optimal” vaccine allocation: versus no vaccination (absolute: B.2, relative: B.3), and versus allocation proportional to city size (absolute: B.4, relative: B.5).

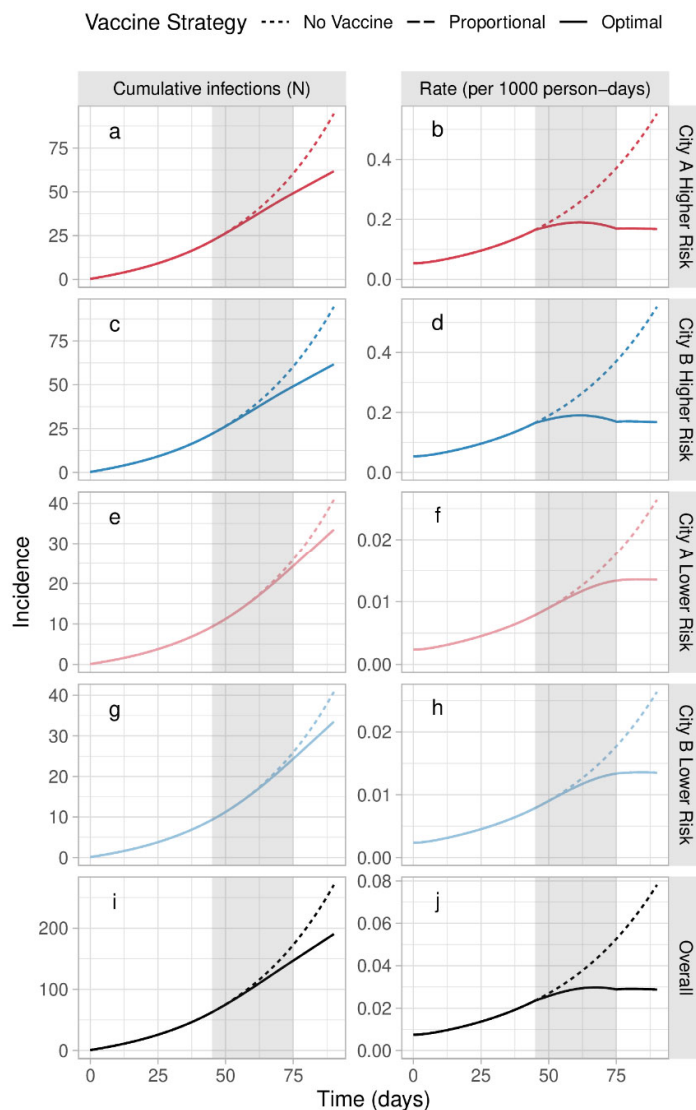

**Figure B.1.** Modelled monkeypox incidence and cumulative infections in cities A and B with default parameters, under 2 different vaccine allocation scenarios

Gray bar indicates period of vaccine roll-out (days 45–75). Risk: risk of MPXV infection/transmission, defined by numbers of sexual partners. The proportional case is not visible because it overlaps exactly with the optimal case.



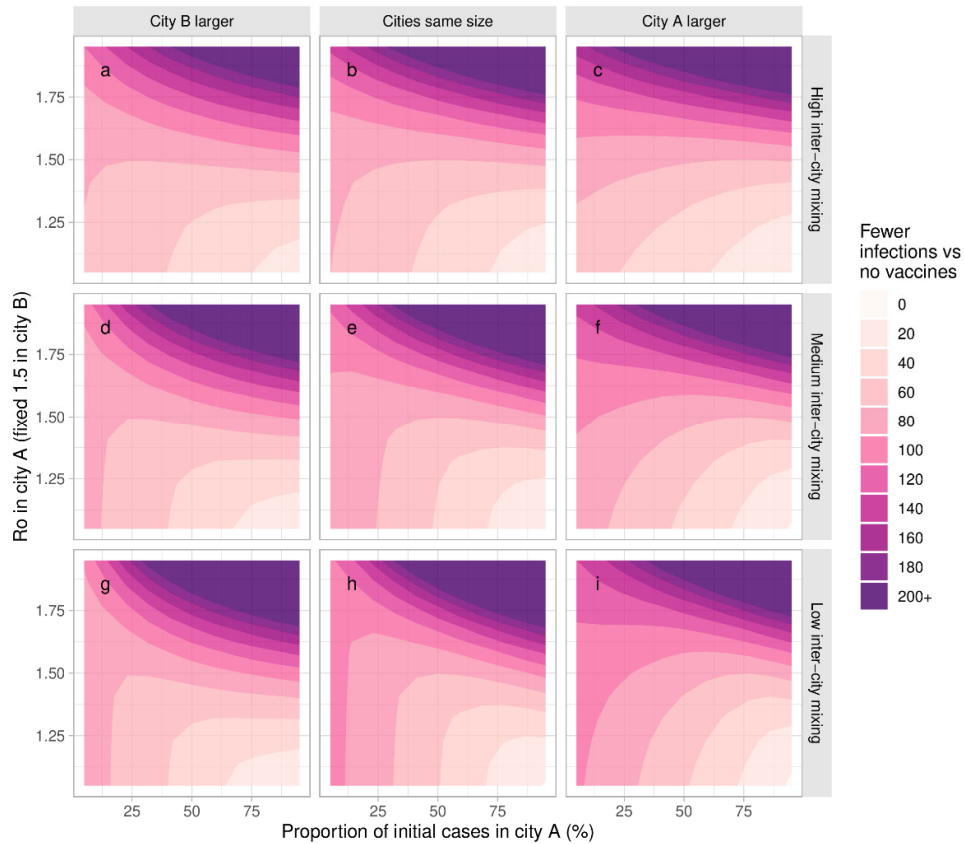

**Figure B.2.** Absolute fewer infections under optimal vaccine allocation versus no vaccination

$R_0$  in city A varies via the sexual activity among the higher risk group in city A. Optimal vaccine allocation is defined as fewest cumulative infections by day 90. The larger city is 3 times the size of the other city. High, medium, low inter-city mixing use  $\epsilon_c = 0.8, 0.9, 0.95$  respectively.

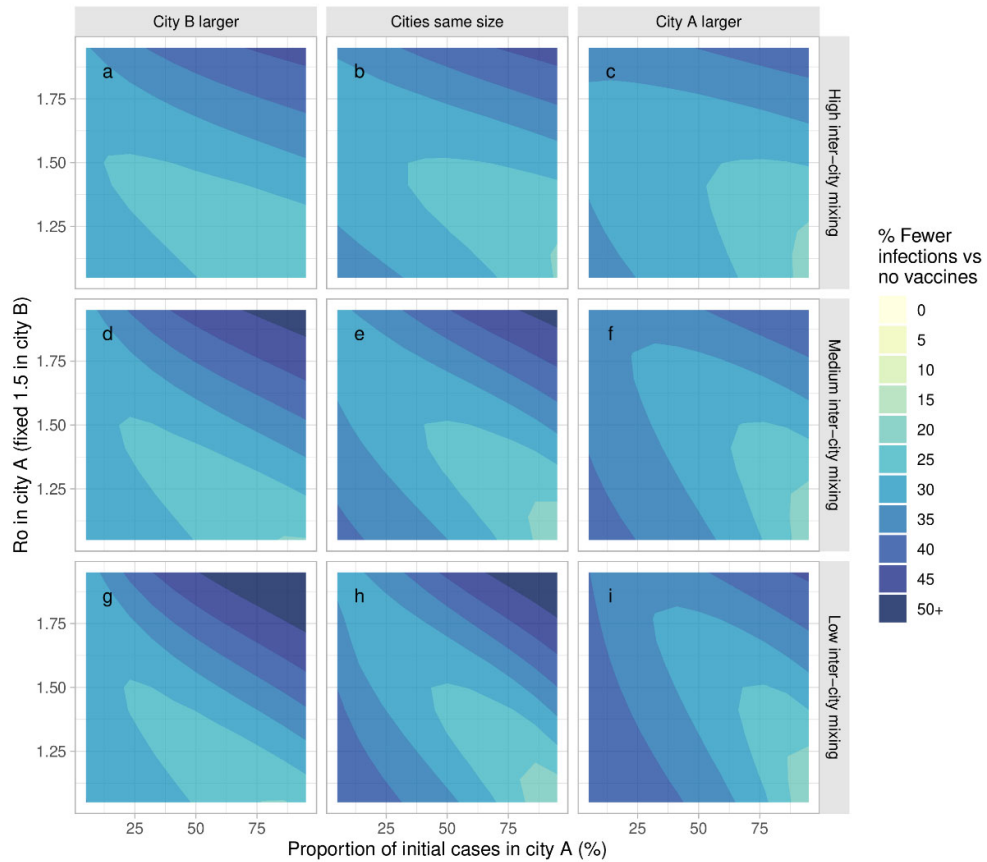

**Figure B.3.** Relative fewer infections under optimal vaccine allocation versus no vaccination

$R_0$  in city A varies via the sexual activity among the higher risk group in city A. Optimal vaccine allocation is defined as fewest cumulative infections by day 90. The larger city is 3 times the size of the other city. High, medium, low inter-city mixing use  $\epsilon_c = 0.8, 0.9, 0.95$  respectively.

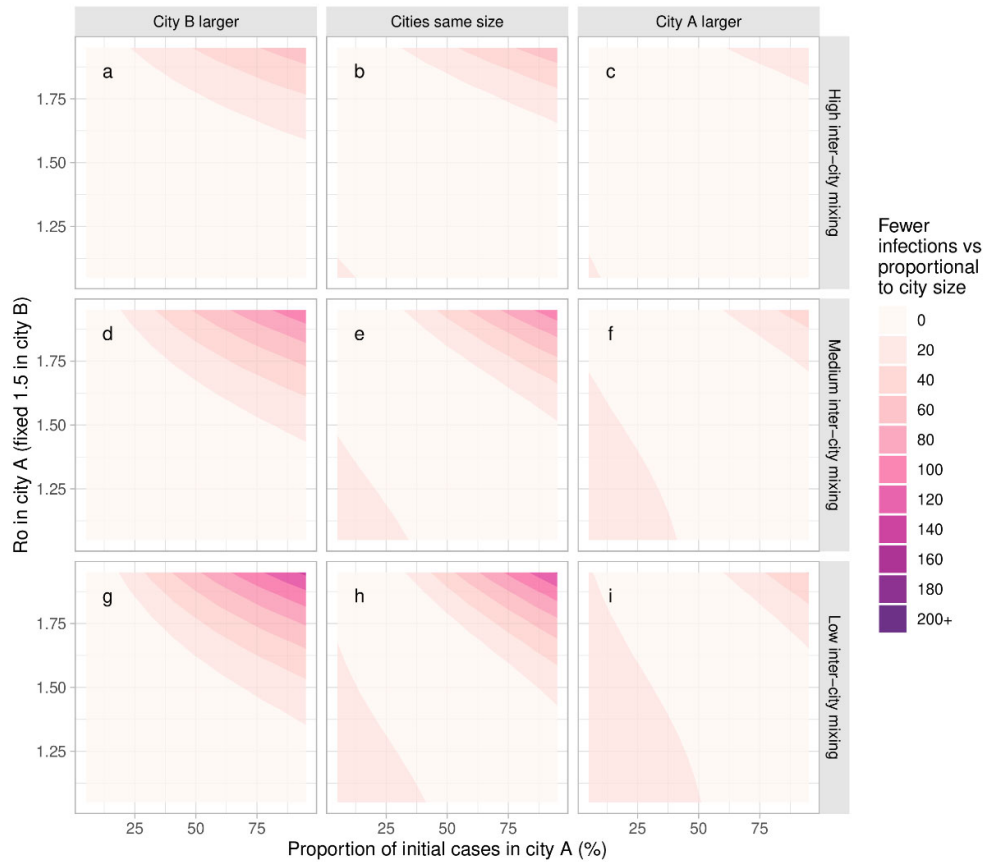

**Figure B.4.** Absolute fewer infections under optimal vaccine allocation versus allocation proportional to city size

$R_0$  in city A varies via the sexual activity among the higher risk group in city A. Optimal vaccine allocation is defined as fewest cumulative infections by day 90. The larger city is 3 times the size of the other city. High, medium, low inter-city mixing use  $\epsilon_c = 0.8, 0.9, 0.95$  respectively.

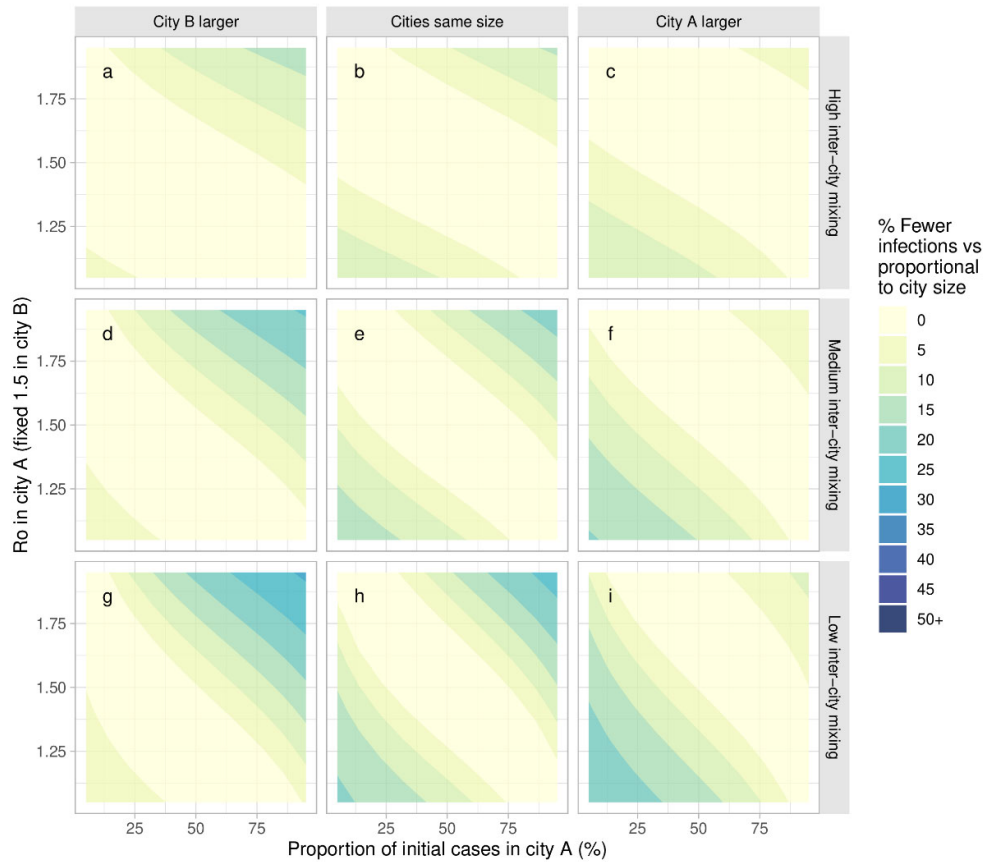

**Figure B.5.** Relative fewer infections under optimal vaccine allocation versus allocation proportional to city size

$R_0$  in city A varies via the sexual activity among the higher risk group in city A. Optimal vaccine allocation is defined as fewest cumulative infections by day 90. The larger city is 3 times the size of the other city. High, medium, low inter-city mixing use  $\epsilon_c = 0.8, 0.9, 0.95$  respectively.

## References

- [1] A. Nold, "Heterogeneity in disease-transmission modeling," *Mathematical Biosciences*, vol. 52, no. 3-4, pp. 227-240, 1980.
- [2] G. P. Garnett and R. M. Anderson, "Balancing sexual partnerships in an age and activity stratified model of HIV transmission in heterosexual populations," *Mathematical Medicine and Biology*, vol. 11, no. 3, pp. 161-192, 1994.
- [3] O. Diekmann, J. A. Heesterbeek and J. A. Metz, "On the definition and the computation of the basic reproduction ratio  $R_0$  in models for infectious diseases in heterogeneous populations," *Journal of Mathematical Biology*, vol. 28, no. 4, pp. 365-382, 1990.
- [4] L. Wang, N. Moqueet, A. Simkin, J. Knight, H. Ma, N. J. Lachowsky, H. L. Armstrong, D. H. S. Tan, A. N. Burchell, T. A. Hart, D. M. Moore, B. D. Adam, D. R. Macfadden, S. Baral and S. Mishra, "Mathematical modelling of the influence of serosorting on the population-level HIV transmission impact of pre-exposure prophylaxis," *AIDS*, vol. 35, p. 1113–1125, June 2021.
- [5] R. M. Milwid, Y. Xia, C. M. Doyle, J. Cox, G. Lambert, R. Thomas, S. Mishra, D. Grace, N. J. Lachowsky, T. A. Hart, M.-C. Boily, Maheu-Giroux and Mathieu, "Past dynamics of HIV transmission among men who have sex with men in Montréal, Canada: a mathematical modeling study," *BMC Infectious Diseases*, vol. 22, no. 1, p. 233, 2022.
- [6] A. Endo, H. Murayama, S. Abbott, R. Ratnayake, C. A. B. Pearson, W. J. Edmunds, E. Fearon and S. Funk, "Heavy-tailed sexual contact networks and the epidemiology of monkeypox outbreak in non-endemic regions, May 2022," *medRxiv*, June 2022.
- [7] E. Armstrong, T. Coleman, N. M. Lewis, S. Coulombe, C. L. Wilson, M. R. Woodford, R. Cameron, C. Davis and R. Travers, "Travelling for sex, attending gay-specific venues, and HIV-related sexual risk among men who have sex with men in Ontario, Canada," *Canadian Journal of Human Sexuality*, vol. 29, p. 380–391, December 2020.
- [8] E. M. Beer and V. Bhargavi Rao, "A systematic review of the epidemiology of human monkeypox outbreaks and implications for outbreak strategy," *PLOS Neglected Tropical Diseases*, vol. 13, p. e0007791, 2019.
- [9] J. P. Thornhill, S. Barkati, S. Walmsley, J. Rockstroh, A. Antinori, L. B. Harrison, R. Palich, A. Nori, I. Reeves, M. S. Habibi, V. Apea, C. Boesecke, L. Vandekerckhove, M. Yakubovsky, E. Sendagorta, J. L. Blanco, E. Florence, D. Moschese, F. M. Maltez, A. Goorhuis, V. Pourcher, P. Migaud, S. Noe, C. Pintado, F. Maggi, A.-B. E. Hansen, C. Hoffmann, J. I. Lezama, C. Mussini, A. Cattelan, K. Makofane, D. Tan, S. Nozza, J. Nemeth, M. B. Klein and C. M. Orkin, "Monkeypox Virus Infection in Humans across 16 Countries - April-June 2022," *New England Journal of Medicine*, July 2022.

- [10] F. Miura, C. E. van Ewijk, J. A. Backer, M. Xiridou, E. Franz, E. Op de Coul, D. Brandwagt, B. van Cleef, G. van Rijckevorsel, C. Swaan, S. van den Hof and J. Wallinga, "Estimated incubation period for monkeypox cases confirmed in the Netherlands, May 2022," *Eurosurveillance*, vol. 27, June 2022.
- [11] K. Charniga, N. B. Masters, R. B. Slayton, L. Gosdin, F. S. Minhaj, D. Philpott, D. Smith, S. Gearhart, F. Alvarado-Ramy, C. Brown, M. A. Waltenburg, C. M. Hughes and Y. Nakazawa, "Estimating the incubation period of monkeypox virus during the 2022 multi-national outbreak," *medRxiv*, June 2022.
- [12] G. Guzzetta, A. Mammone, F. Ferraro, A. Caraglia, A. Rapiti, V. Marziano, P. Poletti, D. Cereda, F. Vairo, G. Mattei, F. Maraglino, G. Rezza and S. Merler, "Early Estimates of Monkeypox Incubation Period, Generation Time, and Reproduction Number, Italy, May–June 2022," *Emerging Infectious Diseases*, vol. 28, no. 10, pp. 2078–2081, 2022.
- [13] H. Adler, S. Gould, P. Hine, L. B. Snell, W. Wong, C. F. Houlihan, J. C. Osborne, T. Rampling, M. B. J. Beadsworth, C. J. A. Duncan, J. Dunning, T. E. Fletcher, E. R. Hunter, M. Jacobs, S. H. Khoo, W. Newsholme, D. Porter, R. J. Porter, L. Ratcliffe, M. L. Schmid, M. G. Semple, A. J. Tunbridge, T. Wingfield, N. M. Price, M. Abouyannis, A. Al-Balushi, S. Aston, R. Ball, N. J. Beeching, T. J. Blanchard, F. Carlin, G. Davies, A. Gillespie, S. R. Hicks, M.-C. Hoyle, C. Ilozue, L. Mair, S. Marshall, A. Neary, E. Nsutebu, S. Parker, H. Ryan, L. Turtle, C. Smith, J. van Aartsen, N. F. Walker, S. Woolley, A. Chawla, I. Hart, A. Smielewska, E. Joekes, C. Benson, C. Brindley, U. Das, C. K. Eyton-Chong, C. Gnanalingham, C. Halfhide, B. Larru, S. Mayell, J. McBride, C. Oliver, P. Paul, A. Riordan, L. Sridhar, M. Storey, A. Abdul, J. Abrahamsen, B. Athan, S. Bhagani, C. S. Brown, O. Carpenter, I. Cropley, K. Frost, S. Hopkins, J. Joyce, L. Lamb, A. Lyons, T. Mahungu, S. Mephram, E. Mukwaira, A. Rodger, C. Taylor, S. Warren, A. Williams, D. Levitt, D. Allen, J. Dixon, A. Evans, P. McNicholas, B. Payne, D. A. Price, U. Schwab, A. Sykes, Y. Taha, M. Ward, M. Emonts, S. Owens, A. Botgros, S. T. Douthwaite, A. Goodman, A. Luintel, E. MacMahon, G. Nebbia, G. O'Hara, J. Parsons, A. Sen, D. Stevenson, T. Sullivan, U. Taj, C. van Nipsen tot Pannerden, H. Winslow, E. Zatyka, E. Alozie-Otuka, C. Beviz, Y. Ceesay, L. Gargee, M. Kabia, H. Mitchell, S. Perkins, M. Sasson, K. Sehmbey, F. Tabios, N. Wigglesworth, E. J. Aarons, T. Brooks, M. Dryden, J. Furneaux, B. Gibney, J. Small, E. Truelove, C. E. Warrell, R. Firth, G. Hobson, C. Johnson, A. Dewynter, S. Nixon, O. Spence, J. J. Bugert and D. E. Hruby, "Clinical features and management of human monkeypox: a retrospective observational study in the UK," *The Lancet Infectious Diseases*, vol. 22, p. 1153–1162, August 2022.
- [14] I. De Baetselier, C. Van Dijck, C. Kenyon, J. Coppens, J. Michiels, T. de Block, H. Smet, S. Coppens, F. Vanroye, J. J. Bugert, P. Giral, S. Zange, L. Liesenborghs, I. Brosius and e. al, "Retrospective detection of asymptomatic monkeypox virus infections among male sexual health clinic attendees in Belgium," *Nature Medicine*, 2022.
- [15] P. E. M. Fine, Z. Jezek, B. Grab and H. Dixon, "The transmission potential of monkeypox virus in human populations," *International Journal of Epidemiology*, vol. 17, p. 643–650, September 1988.

- [16] United States Centers for Disease Control and Prevention, *Monkeypox and Smallpox Vaccine Guidance*, 2022.
- [17] Public Health Agency of Canada, *Interim guidance on the use of Imvamune in the context of monkeypox outbreaks in Canada*, 2022.
- [18] Toronto Public Health, *Monkeypox Vaccine Fact Sheet*, 2022.
- [19] Public Health Ontario, *Monkeypox in Ontario: May 20, 2022 to October 4, 2022*, 2022.
- [20] S. Abbott, J. Hellewell, K. Sherratt, K. Gostic, J. Hickson, H. S. Badr, M. DeWitt, R. Thompson, EpiForecasts and S. Funk, *EpiNow2: Estimate Real-Time Case Counts and Time-Varying Epidemiological Parameters*, 2020.
- [21] T. A. Hart, D. M. Moore, S. W. Noor, N. Lachowsky, D. Grace, J. Cox, S. Skakoon-Sparling, J. Jollimore, A. Parlette, A. Lal, H. Apelian, J. M. Sang, D. H. S. Tan and G. Lambert, "Prevalence of HIV and sexually transmitted and blood-borne infections, and related preventive and risk behaviours, among gay, bisexual and other men who have sex with men in Montreal, Toronto and Vancouver: results from the Engage Study," *Canadian Journal of Public Health*, vol. 112, p. 1020–1029, December 2021.
- [22] N. Brogan, D. M. Paquette, N. J. Lachowsky, M. Blais, D. J. Brennan, T. A. Hart and B. Adam, "Canadian results from the European Men-who-have-sex-with-men Internet survey (EMIS-2017)," *Canada Communicable Disease Report*, vol. 45, no. 11, pp. 271-282, 2019.
- [23] T. Myers, D. Allman, B. Adam, S. Alexander, M. Blais, L. M. Calzavara, R. Remis, R. Marchand and J. Maxwell, "Male Call Canada Technical Report," 2013.
- [24] N. J. Lachowsky, S. Y. Lin, M. W. Hull, Z. Cui, P. Sereda, J. Jollimore, R. Ashleigh, J. S. Montaner, E. A. Roth, R. S. Hogg and D. M. Moore, "Pre-exposure Prophylaxis Awareness Among Gay and Other Men who have Sex with Men in Vancouver, British Columbia, Canada," *AIDS and Behaviour*, vol. 20, pp. 1408-1422, 2016.
- [25] J. Wilton, T. Kain, S. Fowler, T. A. Hart, T. Grennan, J. Maxwell and D. H. Tan, "Use of an HIV-risk screening tool to identify optimal candidates for PrEP scale-up among men who have sex with men in Toronto, Canada: disconnect between objective and subjective HIV risk," *Journal of the International AIDS Society*, vol. 19, no. 1, p. 20777, 2016.
- [26] United Kingdom Health Security Agency, "Investigation into monkeypox outbreak in England: technical briefing," 2022.
- [27] S. Mishra, *Personal Communication*, 2022.
- [28] Public Health Ontario, *Multi-Jurisdictional Monkeypox Outbreak 2022 – What We Know So Far*, 2022.
- [29] A. M. Vaughan, O. Cenciarelli, S. Colombe, L. A. de Sousa, N. Fischer, C. M. Gossner, J. Pires, G. Scardina and e. al, "A large multi-country outbreak of monkeypox across 41 countries in

the WHO European Region, 7 March to 23 August 2022," *Eurosurveillance*, vol. 27, no. 36, p. 2200620, 2022.

- [30] R. M. Anderson, G. F. Medley, R. M. May and A. M. Johnson, "A preliminary study of the transmission dynamics of the Human Immunodeficiency Virus (HIV), the causative agent of AIDS," *Mathematical Medicine and Biology*, vol. 3, no. 4, pp. 229-263, 1986.
